# Supplementary material
Source: Research Square preprint supplement (doi:10.21203/rs.3.rs-9229260/v1)
Supplement: Supplementary file 1 [file 389c9cd8a10129397cb6e4df.doc]

**Table S1.** The resource and definition of the selected covariates

| **Covariates** | **UK Biobank field ID** | **Description** | **Type** | **Category** |
| --- | --- | --- | --- | --- |
| Age | 21022 | The existing variable 'age at recruitment' (21022) was applied. | Continuous | - |
| Race | 21000 | The existing variable 'ethnic background' (21000) was applied. | Categorical | White;  others. |
| Education level | 6138 | The existing variable 'qualifications' (6138) was applied. | Categorical | College or university degree;  others. |
| Smoking status | 20116 | The existing variable 'smoking status' (20116) was applied. | Categorical | Never;  former/current. |
| Drinking status | 20117 | The existing variable 'alcohol drinker status' (20117) was applied. | Categorical | Never;  former/current. |
| Townsend deprivation index | 22189 | The existing variable 'Townsend deprivation index at recruitment' (22189) was applied | Continuous | - |
| Physical activity | 22040 | The existing variable 'summed MET minutes per week for all activity' (22040) was applied. | Continuous | - |
| Body mass index | 21001 | The existing variable 'body mass index (BMI)' (21001) was applied. | Categorical | Underweight or normal;  overweight;  obese. |
| Parity | 2734 | The existing variable 'number of live births' (2734) was applied. | Categorical | 1 birth;  2 births;  >2 births. |
| Family history of hypertension | 20107; 20110 | Self-reported family history of high blood pressure (20107; 20110). | Categorical | Yes;  No. |
| Systolic blood pressure | 4080; 93 | The existing variables 'systolic blood pressure, automated reading' (4080), and 'systolic blood pressure, manual reading' (93) were applied. | Continuous | - |
| Diastolic blood pressure | 4079;94 | The existing variables 'diastolic blood pressure, automated reading' (4079), and 'diastolic blood pressure, manual reading' (94) were applied. | Continuous | - |
| Blood glucose | 30740 | The existing variable 'glucose' (30740) was applied. | Continuous | - |
| Total cholesterol | 30690 | The existing variable 'cholesterol' (30690) was applied. | Continuous | - |
| Low-density lipoprotein cholesterol | 30780 | The existing variable 'LDL direct' (30780) was applied. | Continuous | - |
| High-density lipoprotein cholesterol | 30760 | The existing variable 'HDL cholesterol' (30760) was applied. | Continuous | - |
| Triglycerides | 30870 | The existing variable 'triglycerides' (30870) was applied. | Continuous | - |

**Table S2** Adjusted ORs of all 249 metabolites for the presence of CH after multiple testing at enrollment

| **No.** | **Metabolites** | **OR (95% CI)** | ***P* value** | ***P*FDR** |
| --- | --- | --- | --- | --- |
| **1** | **Total Cholesterol** | **0.652 (0.474, 0.898)** | **0.009** | **0.060** |
| **2** | **Total Cholesterol Minus HDL-C** | **0.644 (0.467, 0.888)** | **0.007** | **0.060** |
| **3** | **Remnant Cholesterol (Non-HDL, Non-LDL -Cholesterol)** | **0.662 (0.479, 0.916)** | **0.013** | **0.067** |
| 4 | VLDL Cholesterol | 0.755 (0.545, 1.047) | 0.092 | 0.257 |
| **5** | **Clinical LDL Cholesterol** | **0.629 (0.459, 0.862)** | **0.004** | **0.060** |
| **6** | **LDL Cholesterol** | **0.647 (0.471, 0.889)** | **0.007** | **0.060** |
| 7 | HDL Cholesterol | 0.861 (0.625, 1.185) | 0.358 | 0.593 |
| 8 | Total Triglycerides | 1.022 (0.749, 1.395) | 0.891 | 0.936 |
| 9 | Triglycerides in VLDL | 1.001 (0.734, 1.365) | 0.996 | 0.996 |
| 10 | Triglycerides in LDL | 1.033 (0.765, 1.396) | 0.830 | 0.911 |
| 11 | Triglycerides in HDL | 1.146 (0.853, 1.540) | 0.366 | 0.593 |
| 12 | Total Phospholipids in Lipoprotein Particles | 0.779 (0.570, 1.065) | 0.117 | 0.292 |
| 13 | Phospholipids in VLDL | 0.851 (0.617, 1.174) | 0.326 | 0.568 |
| **14** | **Phospholipids in LDL** | **0.651 (0.474, 0.894)** | **0.008** | **0.060** |
| 15 | Phospholipids in HDL | 0.974 (0.719, 1.318) | 0.862 | 0.926 |
| **16** | **Total Esterified Cholesterol** | **0.657 (0.478, 0.902)** | **0.009** | **0.060** |
| 17 | Cholesteryl Esters in VLDL | 0.729 (0.526, 1.010) | 0.058 | 0.184 |
| **18** | **Cholesteryl Esters in LDL** | **0.662 (0.481, 0.911)** | **0.011** | **0.065** |
| 19 | Cholesteryl Esters in HDL | 0.864 (0.627, 1.191) | 0.373 | 0.593 |
| **20** | **Total Free Cholesterol** | **0.648 (0.468, 0.897)** | **0.009** | **0.060** |
| 21 | Free Cholesterol in VLDL | 0.815 (0.590, 1.125) | 0.214 | 0.439 |
| **22** | **Free Cholesterol in LDL** | **0.625 (0.456, 0.857)** | **0.004** | **0.060** |
| 23 | Free Cholesterol in HDL | 0.872 (0.634, 1.201) | 0.403 | 0.619 |
| 24 | Total Lipids in Lipoprotein Particles | 0.741 (0.541, 1.017) | 0.063 | 0.194 |
| 25 | Total Lipids in VLDL | 0.882 (0.638, 1.219) | 0.447 | 0.665 |
| **26** | **Total Lipids in LDL** | **0.656 (0.478, 0.900)** | **0.009** | **0.060** |
| 27 | Total Lipids in HDL | 0.925 (0.680, 1.258) | 0.618 | 0.818 |
| 28 | Total Concentration of Lipoprotein Particles | 0.869 (0.640, 1.181) | 0.371 | 0.593 |
| 29 | Concentration of VLDL Particles | 0.829 (0.602, 1.142) | 0.252 | 0.490 |
| **30** | **Concentration of LDL Particles** | **0.661 (0.477, 0.917)** | **0.013** | **0.067** |
| 31 | Concentration of HDL Particles | 0.920 (0.679, 1.247) | 0.592 | 0.809 |
| 32 | Average Diameter for VLDL Particles | 1.005 (0.734, 1.378) | 0.973 | 0.979 |
| 33 | Average Diameter for LDL Particles | 0.864 (0.645, 1.156) | 0.324 | 0.568 |
| 34 | Average Diameter for HDL Particles | 0.871 (0.625, 1.213) | 0.412 | 0.626 |
| 35 | Phosphoglycerides | 0.875 (0.645, 1.188) | 0.393 | 0.608 |
| 36 | Total Cholines | 0.828 (0.608, 1.126) | 0.229 | 0.456 |
| 37 | Phosphatidylcholines | 0.860 (0.632, 1.170) | 0.336 | 0.573 |
| 38 | Sphingomyelins | 0.725 (0.529, 0.992) | 0.044 | 0.151 |
| **39** | **Apolipoprotein B** | **0.655 (0.473, 0.907)** | **0.011** | **0.064** |
| 40 | Apolipoprotein A1 | 0.947 (0.698, 1.283) | 0.724 | 0.863 |
| 41 | Total Fatty Acids | 0.896 (0.655, 1.226) | 0.491 | 0.715 |
| 42 | Degree of Unsaturation | 0.814 (0.594, 1.117) | 0.203 | 0.427 |
| 43 | Omega-3 Fatty Acids | 0.925 (0.673, 1.271) | 0.632 | 0.832 |
| 44 | Omega-6 Fatty Acids | 0.774 (0.566, 1.058) | 0.108 | 0.282 |
| 45 | Polyunsaturated Fatty Acids | 0.787 (0.574, 1.078) | 0.135 | 0.325 |
| 46 | Monounsaturated Fatty Acids | 0.987 (0.717, 1.358) | 0.934 | 0.961 |
| 47 | Saturated Fatty Acids | 0.946 (0.696, 1.285) | 0.721 | 0.863 |
| 48 | Linoleic Acid | 0.768 (0.562, 1.048) | 0.095 | 0.264 |
| 49 | Docosahexaenoic Acid | 0.857 (0.615, 1.196) | 0.365 | 0.593 |
| 50 | Alanine | 0.858 (0.630, 1.170) | 0.334 | 0.573 |
| 51 | Glutamine | 0.912 (0.662, 1.256) | 0.571 | 0.785 |
| **52** | **Glycine** | **0.631 (0.446, 0.892)** | **0.009** | **0.060** |
| 53 | Histidine | 0.956 (0.706, 1.293) | 0.769 | 0.898 |
| 54 | Total Concentration of Branched-Chain Amino Acids (Leucine + Isoleucine + Valine) | 0.928 (0.683, 1.262) | 0.635 | 0.832 |
| 55 | Isoleucine | 0.990 (0.731, 1.341) | 0.948 | 0.963 |
| 56 | Leucine | 0.944 (0.699, 1.274) | 0.705 | 0.863 |
| 57 | Valine | 0.899 (0.658, 1.228) | 0.502 | 0.723 |
| 58 | Phenylalanine | 0.966 (0.719, 1.298) | 0.820 | 0.911 |
| 59 | Tyrosine | 1.098 (0.808, 1.492) | 0.550 | 0.763 |
| 60 | Glucose | 1.285 (0.953, 1.734) | 0.101 | 0.275 |
| 61 | Lactate | 0.924 (0.687, 1.244) | 0.603 | 0.809 |
| 62 | Pyruvate | 0.977 (0.712, 1.341) | 0.885 | 0.934 |
| 63 | Citrate | 0.988 (0.734, 1.331) | 0.938 | 0.961 |
| 64 | 3-Hydroxybutyrate | 1.146 (0.848, 1.548) | 0.376 | 0.593 |
| 65 | Acetate | 0.812 (0.591, 1.116) | 0.199 | 0.424 |
| 66 | Acetoacetate | 1.151 (0.862, 1.537) | 0.341 | 0.573 |
| 67 | Acetone | 0.975 (0.710, 1.339) | 0.875 | 0.929 |
| 68 | Creatinine | 0.928 (0.669, 1.289) | 0.658 | 0.840 |
| 69 | Albumin | 0.853 (0.630, 1.153) | 0.301 | 0.537 |
| 70 | Glycoprotein Acetyls | 1.158 (0.827, 1.621) | 0.392 | 0.608 |
| 71 | Concentration of Chylomicrons and Extremely Large VLDL Particles | 1.081 (0.806, 1.449) | 0.604 | 0.809 |
| 72 | Total Lipids in Chylomicrons and Extremely Large VLDL | 1.056 (0.782, 1.426) | 0.722 | 0.863 |
| 73 | Phospholipids in Chylomicrons and Extremely Large VLDL | 1.097 (0.816, 1.477) | 0.539 | 0.762 |
| 74 | Cholesterol in Chylomicrons and Extremely Large VLDL | 1.073 (0.796, 1.448) | 0.643 | 0.833 |
| 75 | Cholesteryl Esters in Chylomicrons and Extremely Large VLDL | 1.059 (0.785, 1.429) | 0.709 | 0.863 |
| 76 | Free Cholesterol in Chylomicrons and Extremely Large VLDL | 1.094 (0.813, 1.473) | 0.552 | 0.763 |
| 77 | Triglycerides in Chylomicrons and Extremely Large VLDL | 1.050 (0.781, 1.411) | 0.747 | 0.882 |
| 78 | Concentration of Very Large VLDL Particles | 1.012 (0.750, 1.366) | 0.938 | 0.961 |
| 79 | Total Lipids in Very Large VLDL | 0.995 (0.732, 1.352) | 0.975 | 0.979 |
| 80 | Phospholipids in Very Large VLDL | 0.985 (0.726, 1.336) | 0.922 | 0.957 |
| 81 | Cholesterol in Very Large VLDL | 0.902 (0.658, 1.236) | 0.521 | 0.742 |
| 82 | Cholesteryl Esters in Very Large VLDL | 0.847 (0.615, 1.167) | 0.310 | 0.547 |
| 83 | Free Cholesterol in Very Large VLDL | 0.967 (0.712, 1.313) | 0.831 | 0.911 |
| 84 | Triglycerides in Very Large VLDL | 1.044 (0.775, 1.406) | 0.778 | 0.898 |
| 85 | Concentration of Large VLDL Particles | 0.971 (0.719, 1.313) | 0.851 | 0.923 |
| 86 | Total Lipids in Large VLDL | 0.934 (0.684, 1.274) | 0.664 | 0.844 |
| 87 | Phospholipids in Large VLDL | 0.972 (0.714, 1.322) | 0.855 | 0.923 |
| 88 | Cholesterol in Large VLDL | 0.885 (0.645, 1.214) | 0.448 | 0.665 |
| 89 | Cholesteryl Esters in Large VLDL | 0.832 (0.603, 1.148) | 0.262 | 0.506 |
| 90 | Free Cholesterol in Large VLDL | 0.945 (0.694, 1.287) | 0.721 | 0.863 |
| 91 | Triglycerides in Large VLDL | 0.962 (0.714, 1.297) | 0.801 | 0.902 |
| 92 | Concentration of Medium VLDL Particles | 0.740 (0.533, 1.027) | 0.072 | 0.213 |
| 93 | Total Lipids in Medium VLDL | 0.768 (0.555, 1.063) | 0.111 | 0.285 |
| 94 | Phospholipids in Medium VLDL | 0.718 (0.516, 0.998) | 0.049 | 0.164 |
| **95** | **Cholesterol in Medium VLDL** | **0.638 (0.459, 0.887)** | **0.008** | **0.060** |
| **96** | **Cholesteryl Esters in Medium VLDL** | **0.625 (0.453, 0.863)** | **0.004** | **0.060** |
| 97 | Free Cholesterol in Medium VLDL | 0.689 (0.494, 0.961) | 0.028 | 0.112 |
| 98 | Triglycerides in Medium VLDL | 0.937 (0.690, 1.274) | 0.680 | 0.855 |
| 99 | Concentration of Small VLDL Particles | 0.891 (0.649, 1.223) | 0.475 | 0.700 |
| 100 | Total Lipids in Small VLDL | 0.874 (0.633, 1.205) | 0.410 | 0.626 |
| 101 | Phospholipids in Small VLDL | 0.766 (0.553, 1.061) | 0.109 | 0.283 |
| 102 | Cholesterol in Small VLDL | 0.767 (0.555, 1.060) | 0.108 | 0.282 |
| 103 | Cholesteryl Esters in Small VLDL | 0.807 (0.585, 1.112) | 0.190 | 0.415 |
| 104 | Free Cholesterol in Small VLDL | 0.711 (0.513, 0.987) | 0.041 | 0.147 |
| 105 | Triglycerides in Small VLDL | 1.073 (0.792, 1.453) | 0.648 | 0.833 |
| 106 | Concentration of Very Small VLDL Particles | 0.796 (0.579, 1.094) | 0.159 | 0.364 |
| 107 | Total Lipids in Very Small VLDL | 0.811 (0.590, 1.115) | 0.197 | 0.424 |
| 108 | Phospholipids in Very Small VLDL | 0.840 (0.613, 1.150) | 0.277 | 0.515 |
| 109 | Cholesterol in Very Small VLDL | 0.714 (0.518, 0.985) | 0.040 | 0.145 |
| 110 | Cholesteryl Esters in Very Small VLDL | 0.696 (0.504, 0.960) | 0.027 | 0.109 |
| 111 | Free Cholesterol in Very Small VLDL | 0.776 (0.564, 1.068) | 0.120 | 0.295 |
| 112 | Triglycerides in Very Small VLDL | 1.132 (0.837, 1.531) | 0.420 | 0.634 |
| **113** | **Concentration of IDL Particles** | **0.651 (0.473, 0.898)** | **0.009** | **0.060** |
| **114** | **Total Lipids in IDL** | **0.640 (0.465, 0.881)** | **0.006** | **0.060** |
| **115** | **Phospholipids in IDL** | **0.648 (0.469, 0.894)** | **0.008** | **0.060** |
| **116** | **Cholesterol in IDL** | **0.625 (0.455, 0.858)** | **0.004** | **0.060** |
| **117** | **Cholesteryl Esters in IDL** | **0.621 (0.452, 0.853)** | **0.003** | **0.060** |
| **118** | **Free Cholesterol in IDL** | **0.650 (0.474, 0.891)** | **0.007** | **0.060** |
| 119 | Triglycerides in IDL | 1.083 (0.802, 1.463) | 0.603 | 0.809 |
| **120** | **Concentration of Large LDL Particles** | **0.667 (0.484, 0.920)** | **0.013** | **0.067** |
| **121** | **Total Lipids in Large LDL** | **0.651 (0.475, 0.893)** | **0.008** | **0.060** |
| **122** | **Phospholipids in Large LDL** | **0.647 (0.471, 0.888)** | **0.007** | **0.060** |
| **123** | **Cholesterol in Large LDL** | **0.643 (0.468, 0.883)** | **0.006** | **0.060** |
| **124** | **Cholesteryl Esters in Large LDL** | **0.658 (0.479, 0.904)** | **0.010** | **0.060** |
| **125** | **Free Cholesterol in Large LDL** | **0.618 (0.450, 0.850)** | **0.003** | **0.060** |
| 126 | Triglycerides in Large LDL | 1.035 (0.766, 1.397) | 0.824 | 0.911 |
| 127 | Concentration of Medium LDL Particles | 0.682 (0.489, 0.951) | 0.024 | 0.100 |
| **128** | **Total Lipids in Medium LDL** | **0.685 (0.497, 0.944)** | **0.021** | **0.090** |
| **129** | **Phospholipids in Medium LDL** | **0.682 (0.496, 0.938)** | **0.019** | **0.082** |
| **130** | **Cholesterol in Medium LDL** | **0.676 (0.490, 0.933)** | **0.017** | **0.078** |
| 131 | Cholesteryl Esters in Medium LDL | 0.695 (0.502, 0.963) | 0.029 | 0.112 |
| **132** | **Free Cholesterol in Medium LDL** | **0.652 (0.477, 0.892)** | **0.008** | **0.060** |
| 133 | Triglycerides in Medium LDL | 1.036 (0.769, 1.396) | 0.817 | 0.911 |
| **134** | **Concentration of Small LDL Particles** | **0.658 (0.471, 0.917)** | **0.013** | **0.067** |
| **135** | **Total Lipids in Small LDL** | **0.660 (0.478, 0.912)** | **0.012** | **0.065** |
| **136** | **Phospholipids in Small LDL** | **0.655 (0.476, 0.900)** | **0.009** | **0.060** |
| **137** | **Cholesterol in Small LDL** | **0.654 (0.474, 0.903)** | **0.010** | **0.060** |
| **138** | **Cholesteryl Esters in Small LDL** | **0.676 (0.487, 0.937)** | **0.019** | **0.082** |
| **139** | **Free Cholesterol in Small LDL** | **0.639 (0.468, 0.871)** | **0.005** | **0.060** |
| 140 | Triglycerides in Small LDL | 1.039 (0.773, 1.396) | 0.800 | 0.902 |
| 141 | Concentration of Very Large HDL Particles | 0.762 (0.528, 1.100) | 0.146 | 0.344 |
| 142 | Total Lipids in Very Large HDL | 0.787 (0.552, 1.123) | 0.187 | 0.415 |
| 143 | Phospholipids in Very Large HDL | 0.825 (0.582, 1.171) | 0.281 | 0.515 |
| 144 | Cholesterol in Very Large HDL | 0.746 (0.517, 1.077) | 0.117 | 0.292 |
| 145 | Cholesteryl Esters in Very Large HDL | 0.752 (0.520, 1.086) | 0.129 | 0.314 |
| 146 | Free Cholesterol in Very Large HDL | 0.743 (0.518, 1.064) | 0.105 | 0.282 |
| 147 | Triglycerides in Very Large HDL | 0.984 (0.733, 1.320) | 0.913 | 0.952 |
| 148 | Concentration of Large HDL Particles | 0.853 (0.606, 1.201) | 0.363 | 0.593 |
| 149 | Total Lipids in Large HDL | 0.860 (0.619, 1.195) | 0.369 | 0.593 |
| 150 | Phospholipids in Large HDL | 0.906 (0.655, 1.252) | 0.549 | 0.763 |
| 151 | Cholesterol in Large HDL | 0.824 (0.585, 1.160) | 0.267 | 0.512 |
| 152 | Cholesteryl Esters in Large HDL | 0.824 (0.584, 1.163) | 0.271 | 0.512 |
| 153 | Free Cholesterol in Large HDL | 0.847 (0.603, 1.190) | 0.340 | 0.573 |
| 154 | Triglycerides in Large HDL | 1.058 (0.793, 1.411) | 0.702 | 0.863 |
| 155 | Concentration of Medium HDL Particles | 1.011 (0.748, 1.365) | 0.945 | 0.963 |
| 156 | Total Lipids in Medium HDL | 1.028 (0.764, 1.383) | 0.856 | 0.923 |
| 157 | Phospholipids in Medium HDL | 1.072 (0.800, 1.438) | 0.640 | 0.833 |
| 158 | Cholesterol in Medium HDL | 0.976 (0.720, 1.323) | 0.877 | 0.929 |
| 159 | Cholesteryl Esters in Medium HDL | 0.983 (0.725, 1.333) | 0.914 | 0.952 |
| 160 | Free Cholesterol in Medium HDL | 0.969 (0.715, 1.313) | 0.838 | 0.915 |
| 161 | Triglycerides in Medium HDL | 1.180 (0.878, 1.585) | 0.271 | 0.512 |
| 162 | Concentration of Small HDL Particles | 0.937 (0.693, 1.268) | 0.674 | 0.852 |
| 163 | Total Lipids in Small HDL | 1.042 (0.770, 1.409) | 0.791 | 0.902 |
| 164 | Phospholipids in Small HDL | 1.084 (0.803, 1.463) | 0.599 | 0.809 |
| 165 | Cholesterol in Small HDL | 0.942 (0.698, 1.271) | 0.697 | 0.863 |
| 166 | Cholesteryl Esters in Small HDL | 0.946 (0.702, 1.273) | 0.712 | 0.863 |
| 167 | Free Cholesterol in Small HDL | 0.944 (0.698, 1.277) | 0.708 | 0.863 |
| 168 | Triglycerides in Small HDL | 1.180 (0.867, 1.606) | 0.293 | 0.528 |
| 169 | Ratio of triglycerides to phosphoglycerides | 1.115 (0.816, 1.523) | 0.496 | 0.718 |
| 170 | Ratio of apolipoprotein B to apolipoprotein A1 | 0.753 (0.553, 1.025) | 0.071 | 0.213 |
| 171 | Ratio of omega-3 fatty acids to total fatty acids | 0.941 (0.679, 1.302) | 0.712 | 0.863 |
| 172 | Ratio of omega-6 fatty acids to total fatty acids | 0.820 (0.606, 1.109) | 0.198 | 0.424 |
| 173 | Ratio of polyunsaturated fatty acids to total fatty acids | 0.803 (0.592, 1.088) | 0.156 | 0.363 |
| 174 | Ratio of monounsaturated fatty acids to total fatty acids | 1.251 (0.885, 1.768) | 0.204 | 0.427 |
| 175 | Ratio of saturated fatty acids to total fatty acids | 1.138 (0.855, 1.515) | 0.375 | 0.593 |
| 176 | Ratio of linoleic acid to total fatty acids | 0.750 (0.554, 1.016) | 0.063 | 0.194 |
| 177 | Ratio of docosahexaenoic acid to total fatty acids | 0.895 (0.644, 1.246) | 0.512 | 0.733 |
| 178 | Ratio of polyunsaturated fatty acids to monounsaturated fatty acids | 0.786 (0.562, 1.099) | 0.159 | 0.364 |
| 179 | Ratio of omega-6 fatty acids to omega-3 fatty acids | 1.008 (0.729, 1.393) | 0.963 | 0.975 |
| 180 | Phospholipids to total lipids ratio in chylomicrons and extremely large VLDL | 1.268 (0.845, 1.902) | 0.251 | 0.490 |
| 181 | Cholesterol to total lipids ratio in chylomicrons and extremely large VLDL | 1.150 (0.840, 1.575) | 0.384 | 0.601 |
| 182 | Cholesteryl esters to total lipids ratio in chylomicrons and extremely large VLDL | 1.044 (0.757, 1.441) | 0.792 | 0.902 |
| 183 | Free cholesterol to total lipids ratio in chylomicrons and extremely large VLDL | 1.285 (0.943, 1.752) | 0.112 | 0.285 |
| 184 | Triglycerides to total lipids ratio in chylomicrons and extremely large VLDL | 0.866 (0.645, 1.163) | 0.339 | 0.573 |
| 185 | Phospholipids to total lipids ratio in very large VLDL | 0.893 (0.649, 1.228) | 0.485 | 0.710 |
| 186 | Cholesterol to total lipids ratio in very large VLDL | 0.705 (0.511, 0.974) | 0.034 | 0.126 |
| 187 | Cholesteryl esters to total lipids ratio in very large VLDL | 0.709 (0.517, 0.973) | 0.033 | 0.125 |
| 188 | Free cholesterol to total lipids ratio in very large VLDL | 0.742 (0.526, 1.047) | 0.090 | 0.254 |
| 189 | Triglycerides to total lipids ratio in very large VLDL | 1.612 (1.055, 2.464) | 0.027 | 0.109 |
| 190 | Phospholipids to total lipids ratio in large VLDL | 1.114 (0.787, 1.577) | 0.542 | 0.762 |
| 191 | Cholesterol to total lipids ratio in large VLDL | 0.786 (0.587, 1.052) | 0.106 | 0.282 |
| 192 | Cholesteryl esters to total lipids ratio in large VLDL | 0.743 (0.552, 0.999) | 0.049 | 0.164 |
| 193 | Free cholesterol to total lipids ratio in large VLDL | 0.957 (0.703, 1.302) | 0.779 | 0.898 |
| 194 | Triglycerides to total lipids ratio in large VLDL | 1.131 (0.837, 1.526) | 0.423 | 0.634 |
| **195** | **Phospholipids to total lipids ratio in medium VLDL** | **0.660 (0.490, 0.889)** | **0.006** | **0.060** |
| **196** | **Cholesterol to total lipids ratio in medium VLDL** | **0.692 (0.511, 0.937)** | **0.017** | **0.078** |
| 197 | Cholesteryl esters to total lipids ratio in medium VLDL | 0.715 (0.517, 0.989) | 0.042 | 0.147 |
| **198** | **Free cholesterol to total lipids ratio in medium VLDL** | **0.674 (0.500, 0.909)** | **0.010** | **0.060** |
| **199** | **Triglycerides to total lipids ratio in medium VLDL** | **1.509 (1.111, 2.048)** | **0.008** | **0.060** |
| **200** | **Phospholipids to total lipids ratio in small VLDL** | **0.613 (0.451, 0.834)** | **0.002** | **0.060** |
| **201** | **Cholesterol to total lipids ratio in small VLDL** | **0.685 (0.509, 0.922)** | **0.012** | **0.067** |
| 202 | Cholesteryl esters to total lipids ratio in small VLDL | 0.751 (0.563, 1.001) | 0.051 | 0.168 |
| **203** | **Free cholesterol to total lipids ratio in small VLDL** | **0.622 (0.455, 0.851)** | **0.003** | **0.060** |
| **204** | **Triglycerides to total lipids ratio in small VLDL** | **1.543 (1.143, 2.082)** | **0.005** | **0.060** |
| 205 | Phospholipids to total lipids ratio in very small VLDL | 1.179 (0.875, 1.588) | 0.278 | 0.515 |
| **206** | **Cholesterol to total lipids ratio in very small VLDL** | **0.642 (0.463, 0.890)** | **0.008** | **0.060** |
| **207** | **Cholesteryl esters to total lipids ratio in very small VLDL** | **0.644 (0.459, 0.905)** | **0.011** | **0.065** |
| **208** | **Free cholesterol to total lipids ratio in very small VLDL** | **0.668 (0.499, 0.896)** | **0.007** | **0.060** |
| **209** | **Triglycerides to total lipids ratio in very small VLDL** | **1.579 (1.158, 2.152)** | **0.004** | **0.060** |
| 210 | Phospholipids to total lipids ratio in IDL | 1.067 (0.808, 1.409) | 0.649 | 0.833 |
| **211** | **Cholesterol to total lipids ratio in IDL** | **0.664 (0.495, 0.892)** | **0.007** | **0.060** |
| **212** | **Cholesteryl esters to total lipids ratio in IDL** | **0.662 (0.491, 0.892)** | **0.007** | **0.060** |
| 213 | Free cholesterol to total lipids ratio in IDL | 0.855 (0.635, 1.151) | 0.302 | 0.537 |
| **214** | **Triglycerides to total lipids ratio in IDL** | **1.596 (1.168, 2.180)** | **0.003** | **0.060** |
| 215 | Phospholipids to total lipids ratio in large LDL | 1.037 (0.770, 1.397) | 0.812 | 0.910 |
| **216** | **Cholesterol to total lipids ratio in large LDL** | **0.481 (0.266, 0.870)** | **0.015** | **0.073** |
| 217 | Cholesteryl esters to total lipids ratio in large LDL | 0.846 (0.624, 1.146) | 0.280 | 0.515 |
| **218** | **Free cholesterol to total lipids ratio in large LDL** | **0.466 (0.251, 0.865)** | **0.016** | **0.073** |
| **219** | **Triglycerides to total lipids ratio in large LDL** | **1.586 (1.134, 2.218)** | **0.007** | **0.060** |
| 220 | Phospholipids to total lipids ratio in medium LDL | 0.924 (0.678, 1.259) | 0.617 | 0.818 |
| 221 | Cholesterol to total lipids ratio in medium LDL | 0.702 (0.503, 0.979) | 0.037 | 0.136 |
| 222 | Cholesteryl esters to total lipids ratio in medium LDL | 0.955 (0.695, 1.313) | 0.777 | 0.898 |
| 223 | Free cholesterol to total lipids ratio in medium LDL | 0.747 (0.495, 1.128) | 0.166 | 0.375 |
| **224** | **Triglycerides to total lipids ratio in medium LDL** | **1.500 (1.105, 2.037)** | **0.009** | **0.060** |
| 225 | Phospholipids to total lipids ratio in small LDL | 1.027 (0.753, 1.401) | 0.866 | 0.926 |
| 226 | Cholesterol to total lipids ratio in small LDL | 0.754 (0.559, 1.017) | 0.064 | 0.195 |
| 227 | Cholesteryl esters to total lipids ratio in small LDL | 0.947 (0.691, 1.299) | 0.737 | 0.874 |
| 228 | Free cholesterol to total lipids ratio in small LDL | 0.780 (0.537, 1.131) | 0.190 | 0.415 |
| 229 | Triglycerides to total lipids ratio in small LDL | 1.397 (1.034, 1.886) | 0.029 | 0.113 |
| 230 | Phospholipids to total lipids ratio in very large HDL | 0.962 (0.718, 1.290) | 0.798 | 0.902 |
| 231 | Cholesterol to total lipids ratio in very large HDL | 0.956 (0.721, 1.266) | 0.753 | 0.884 |
| 232 | Cholesteryl esters to total lipids ratio in very large HDL | 0.820 (0.613, 1.095) | 0.178 | 0.400 |
| 233 | Free cholesterol to total lipids ratio in very large HDL | 1.163 (0.850, 1.593) | 0.345 | 0.576 |
| 234 | Triglycerides to total lipids ratio in very large HDL | 1.186 (0.865, 1.626) | 0.289 | 0.525 |
| **235** | **Phospholipids to total lipids ratio in large HDL** | **1.496 (1.085, 2.064)** | **0.014** | **0.068** |
| 236 | Cholesterol to total lipids ratio in large HDL | 0.722 (0.527, 0.989) | 0.042 | 0.147 |
| 237 | Cholesteryl esters to total lipids ratio in large HDL | 0.761 (0.560, 1.035) | 0.082 | 0.241 |
| 238 | Free cholesterol to total lipids ratio in large HDL | 0.703 (0.518, 0.955) | 0.024 | 0.100 |
| 239 | Triglycerides to total lipids ratio in large HDL | 1.221 (0.889, 1.677) | 0.217 | 0.442 |
| 240 | Phospholipids to total lipids ratio in medium HDL | 1.363 (0.984, 1.887) | 0.062 | 0.194 |
| 241 | Cholesterol to total lipids ratio in medium HDL | 0.787 (0.574, 1.078) | 0.136 | 0.325 |
| 242 | Cholesteryl esters to total lipids ratio in medium HDL | 0.833 (0.612, 1.132) | 0.243 | 0.480 |
| 243 | Free cholesterol to total lipids ratio in medium HDL | 0.732 (0.531, 1.008) | 0.056 | 0.182 |
| 244 | Triglycerides to total lipids ratio in medium HDL | 1.225 (0.887, 1.692) | 0.218 | 0.442 |
| 245 | Phospholipids to total lipids ratio in small HDL | 1.244 (0.930, 1.663) | 0.142 | 0.336 |
| 246 | Cholesterol to total lipids ratio in small HDL | 0.774 (0.576, 1.039) | 0.088 | 0.252 |
| 247 | Cholesteryl esters to total lipids ratio in small HDL | 0.837 (0.628, 1.115) | 0.224 | 0.449 |
| 248 | Free cholesterol to total lipids ratio in small HDL | 0.736 (0.520, 1.043) | 0.084 | 0.245 |
| 249 | Triglycerides to total lipids ratio in small HDL | 1.229 (0.892, 1.695) | 0.207 | 0.431 |

ORs are per 1 SD higher of Z-transformed metabolic marker and are adjusted for age, race, education, smoking status, drinking status, TDI, physical activity, BMI, parity and family history of CH.

Abbreviations: OR, odds ratio; CI, confidence interval; HDL, high-density lipoprotein; LDL, low-density lipoprotein; VLDL, very-low-density lipoprotein; IDL, intermediate-density lipoprotein.

**Table S3.** Detailed information on IVs used in MR analyses

|  | **Metabolites** | **SNPs** |  | **Horizontal pleiotropy of IVs** | | |  | **Heterogeneity of IVs** | |
| --- | --- | --- | --- | --- | --- | --- | --- | --- | --- |
|  |  | **Intercept** | **SE** | ***P* value** |  | **Q estimate** | ***P* value** |
| 1 | Total Cholesterol | 46 |  | -1.523E-04 | 0.003 | 0.956 |  | 68.983 | 1.225E-02 |
| 2 | Total Cholesterol Minus HDL-C | 42 |  | -5.976E-04 | 0.003 | 0.838 |  | 79.025 | 3.320E-04 |
| 3 | Remnant Cholesterol (Non-HDL, Non-LDL-Cholesterol) | 44 |  | 1.780E-03 | 0.003 | 0.513 |  | 80.476 | 4.630E-04 |
| 4 | Clinical LDL Cholesterol | 39 |  | -5.312E-04 | 0.003 | 0.856 |  | 78.141 | 1.355E-04 |
| 5 | LDL Cholesterol | 40 |  | 3.211E-04 | 0.003 | 0.914 |  | 79.447 | 1.396E-04 |
| 6 | Phospholipids in LDL | 42 |  | 4.474E-04 | 0.003 | 0.876 |  | 89.691 | 1.721E-05 |
| 7 | Total Esterified Cholesterol | 53 |  | -2.293E-04 | 0.003 | 0.941 |  | 108.824 | 6.714E-06 |
| 8 | Cholesteryl Esters in LDL | 38 |  | 5.278E-04 | 0.003 | 0.868 |  | 75.539 | 1.887E-04 |
| 9 | Total Free Cholesterol | 47 |  | 2.394E-04 | 0.003 | 0.932 |  | 77.644 | 2.428E-03 |
| 10 | Free Cholesterol in LDL | 44 |  | -8.887E-04 | 0.003 | 0.761 |  | 80.271 | 4.880E-04 |
| 11 | Total Lipids in LDL | 39 |  | 6.479E-04 | 0.003 | 0.832 |  | 77.615 | 1.569E-04 |
| 12 | Concentration of LDL Particles | 47 |  | -1.223E-04 | 0.003 | 0.963 |  | 86.339 | 2.927E-04 |
| 13 | Apolipoprotein B | 45 |  | -5.196E-04 | 0.003 | 0.850 |  | 86.451 | 1.389E-04 |
| 14 | Glycine | 33 |  | -2.582E-03 | 0.002 | 0.243 |  | 64.521 | 5.710E-04 |
| 15 | Cholesterol in Medium VLDL | 39 |  | -1.220E-03 | 0.002 | 0.626 |  | 52.561 | 5.831E-02 |
| 16 | Cholesteryl Esters in Medium VLDL | 39 |  | -3.265E-03 | 0.003 | 0.246 |  | 66.691 | 2.738E-03 |
| 17 | Concentration of IDL Particles | 37 |  | -2.088E-03 | 0.003 | 0.485 |  | 62.653 | 3.859E-03 |
| 18 | Total Lipids in IDL | 50 |  | -3.236E-03 | 0.003 | 0.235 |  | 95.139 | 8.680E-05 |
| 19 | Phospholipids in IDL | 49 |  | -3.071E-03 | 0.002 | 0.182 |  | 81.819 | 1.685E-03 |
| 20 | Cholesterol in IDL | 51 |  | -2.436E-03 | 0.003 | 0.400 |  | 95.981 | 9.968E-05 |
| 21 | Cholesteryl Esters in IDL | 49 |  | -3.173E-03 | 0.003 | 0.289 |  | 91.902 | 1.410E-04 |
| 22 | Free Cholesterol in IDL | 48 |  | -2.486E-03 | 0.003 | 0.384 |  | 90.382 | 1.466E-04 |
| 23 | Concentration of Large LDL | 49 |  | 8.561E-04 | 0.002 | 0.721 |  | 87.835 | 3.964E-04 |
| 24 | Total Lipids in Large LDL | 40 |  | -9.485E-04 | 0.003 | 0.742 |  | 72.464 | 9.005E-04 |
| 25 | Phospholipids in Large LDL | 40 |  | 5.879E-04 | 0.003 | 0.841 |  | 79.107 | 1.533E-04 |
| 26 | Cholesterol in Large LDL | 41 |  | -8.184E-04 | 0.003 | 0.770 |  | 71.515 | 1.604E-03 |
| 27 | Cholesteryl Esters in Large LDL | 41 |  | 8.899E-04 | 0.003 | 0.770 |  | 80.432 | 1.567E-04 |
| 28 | Free Cholesterol in Large LDL | 45 |  | -2.288E-03 | 0.003 | 0.388 |  | 73.963 | 3.126E-03 |
| 29 | Total Lipids in Medium LDL | 40 |  | -1.416E-04 | 0.003 | 0.966 |  | 87.728 | 1.298E-05 |
| 30 | Phospholipids in Medium LDL | 39 |  | -3.185E-03 | 0.003 | 0.272 |  | 69.047 | 1.525E-03 |
| 31 | Cholesterol in Medium LDL | 40 |  | -3.522E-04 | 0.003 | 0.914 |  | 86.804 | 1.705E-05 |
| 32 | Free Cholesterol in Medium LDL | 41 |  | -4.126E-03 | 0.003 | 0.135 |  | 78.156 | 2.900E-04 |
| 33 | Concentration of Small LDL Particles | 46 |  | 2.075E-03 | 0.003 | 0.440 |  | 80.003 | 1.018E-03 |
| 34 | Total Lipids in Small LDL | 40 |  | 1.049E-03 | 0.003 | 0.721 |  | 76.011 | 3.554E-04 |
| 35 | Phospholipids in Small LDL | 44 |  | -6.421E-04 | 0.003 | 0.816 |  | 94.850 | 8.955E-06 |
| 36 | Cholesterol in Small LDL | 41 |  | 7.102E-04 | 0.003 | 0.806 |  | 84.956 | 4.432E-05 |
| 37 | Cholesteryl Esters in Small LDL | 43 |  | 1.671E-03 | 0.003 | 0.605 |  | 99.673 | 1.365E-06 |
| 38 | Free Cholesterol in Small LDL | 44 |  | -2.981E-03 | 0.002 | 0.239 |  | 75.879 | 1.458E-03 |
| 39 | Phospholipids to Total Lipids in Medium VLDL percentage | 39 |  | -2.498E-03 | 0.003 | 0.406 |  | 73.558 | 4.733E-04 |
| 40 | Cholesterol to Total Lipids in Medium VLDL percentage | 58 |  | -5.199E-03 | 0.003 | 0.084 |  | 168.192 | 6.587E-13 |
| 41 | Free Cholesterol to Total Lipids in Medium VLDL percentage | 42 |  | -4.229E-03 | 0.003 | 0.159 |  | 76.843 | 5.863E-04 |
| 42 | Triglycerides to Total Lipids in Medium VLDL percentage | 51 |  | 5.304E-03 | 0.003 | 0.116 |  | 146.491 | 2.091E-11 |
| 43 | Phospholipids to Total Lipids in Small VLDL percentage | 45 |  | -2.810E-03 | 0.003 | 0.301 |  | 69.370 | 8.686E-03 |
| 44 | Cholesterol to Total Lipids in Small VLDL percentage | 42 |  | -5.905E-03 | 0.003 | 0.047 |  | 80.730 | 2.109E-04 |
| 45 | Free Cholesterol to Total Lipids in Small VLDL percentage | 50 |  | -3.723E-03 | 0.003 | 0.246 |  | 124.710 | 1.577E-08 |
| 46 | Triglycerides to Total Lipids in Small VLDL percentage | 46 |  | 5.770E-03 | 0.003 | 0.053 |  | 91.880 | 4.668E-05 |
| 47 | Cholesterol to Total Lipids in Very Small VLDL percentage | 50 |  | -6.571E-04 | 0.003 | 0.837 |  | 126.977 | 7.676E-09 |
| 48 | Cholesteryl Esters to Total Lipids in Very Small VLDL percentage | 52 |  | -1.121E-03 | 0.003 | 0.708 |  | 124.824 | 3.972E-08 |
| 49 | Free Cholesterol to Total Lipids in Very Small VLDL percentage | 32 |  | -4.153E-03 | 0.004 | 0.250 |  | 74.976 | 1.651E-05 |
| 50 | Triglycerides to Total Lipids in Very Small VLDL percentage | 52 |  | 2.442E-03 | 0.003 | 0.449 |  | 134.093 | 2.142E-09 |
| 51 | Cholesterol to Total Lipids in IDL percentage | 45 |  | 4.924E-03 | 0.003 | 0.062 |  | 72.605 | 4.261E-03 |
| 52 | Cholesteryl Esters to Total Lipids in IDL percentage | 36 |  | 3.806E-03 | 0.003 | 0.220 |  | 60.367 | 4.890E-03 |
| 53 | Triglycerides to Total Lipids in IDL percentage | 57 |  | 1.224E-03 | 0.003 | 0.705 |  | 182.857 | 2.262E-15 |
| 54 | Cholesterol to Total Lipids in Large LDL percentage | 44 |  | 2.492E-04 | 0.004 | 0.950 |  | 85.978 | 1.086E-04 |
| 55 | Free Cholesterol to Total Lipids in Large LDL percentage | 59 |  | -2.941E-03 | 0.002 | 0.239 |  | 149.194 | 5.678E-10 |
| 56 | Triglycerides to Total Lipids in Large LDL percentage | 43 |  | -2.667E-03 | 0.003 | 0.438 |  | 79.287 | 4.432E-04 |
| 57 | Triglycerides to Total Lipids in Medium LDL percentage | 45 |  | -7.058E-04 | 0.003 | 0.788 |  | 81.449 | 5.101E-04 |
| 58 | Phospholipids to Total Lipids in Large HDL percentage | 50 |  | -1.865E-04 | 0.003 | 0.948 |  | 96.870 | 5.496E-05 |

Abbreviations: SNPs, single nucleotide polymorphisms; IVs, instrumental variables; SE, standard error; HDL, high-density lipoprotein; VLDL, very-low-density lipoprotein; IDL, intermediate-density lipoprotein; LDL, low-density lipoprotein.

**Table S4.** The association of genetically predicted 58 metabolites with the risk of CH

| **Metabolites** | **Subgroup** | **SNPs** | **Method** | **OR (95%CI)** | ***P* value** | ***P* FDR** |
| --- | --- | --- | --- | --- | --- | --- |
| Total Cholesterol | Cholesterol | 46 | IVW | 1.030 (0.979, 1.085) | 2.558E-01 | 4.489E-01 |
| MR Egger | 1.033 (0.936, 1.139) | 5.213E-01 | 6.971E-01 |
| Weighted median | 1.054 (0.988, 1.125) | 1.101E-01 | 1.389E-01 |
| MR-RAPS | 1.031 (0.988, 1.075) | 1.568E-01 | 9.656E-01 |
| Maximum likelihood | 1.031 (0.988, 1.075) | 1.559E-01 | 2.511E-01 |
| Total Cholesterol Minus HDL-C | Cholesterol | 42 | IVW | 1.033 (0.976, 1.093) | 2.677E-01 | 4.489E-01 |
| MR Egger | 1.042 (0.941, 1.153) | 4.340E-01 | 6.971E-01 |
| Weighted median | 1.062 (0.994, 1.133) | 7.446E-02 | 1.207E-01 |
| MR-RAPS | 1.035 (0.993, 1.078) | 1.022E-01 | 9.656E-01 |
| Maximum likelihood | 1.033 (0.991, 1.077) | 1.197E-01 | 2.240E-01 |
| Remnant Cholesterol (Non-HDL, Non-LDL -Cholesterol) | Cholesterol | 44 | IVW | 1.078 (1.017, 1.141) | 1.092E-02 | 5.756E-02 |
| MR Egger | 1.048 (0.946, 1.160) | 3.741E-01 | 6.971E-01 |
| Weighted median | 1.062 (0.998, 1.130) | 5.955E-02 | 1.207E-01 |
| MR-RAPS | 1.080 (1.036, 1.127) | 3.288E-04 | 9.656E-01 |
| Maximum likelihood | 1.078 (1.033, 1.125) | 5.114E-04 | 2.696E-03 |
| Clinical LDL Cholesterol | Cholesterol | 39 | IVW | 1.037 (0.978, 1.101) | 2.264E-01 | 4.489E-01 |
| MR Egger | 1.045 (0.946, 1.154) | 3.899E-01 | 6.971E-01 |
| Weighted median | 1.060 (0.991, 1.133) | 8.881E-02 | 1.220E-01 |
| MR-RAPS | 1.039 (0.997, 1.083) | 6.732E-02 | 9.656E-01 |
| Maximum likelihood | 1.038 (0.996, 1.082) | 7.933E-02 | 1.705E-01 |
| LDL Cholesterol | Cholesterol | 40 | IVW | 1.038 (0.978, 1.102) | 2.233E-01 | 4.489E-01 |
| MR Egger | 1.033 (0.932, 1.145) | 5.388E-01 | 6.971E-01 |
| Weighted median | 1.063 (0.994, 1.136) | 7.322E-02 | 1.207E-01 |
| MR-RAPS | 1.039 (0.996, 1.083) | 7.851E-02 | 9.656E-01 |
| Maximum likelihood | 1.039 (0.996, 1.083) | 7.876E-02 | 1.705E-01 |
| Phospholipids in LDL | Phospholipids | 42 | IVW | 1.037 (0.976, 1.101) | 2.463E-01 | 4.489E-01 |
| MR Egger | 1.030 (0.930, 1.140) | 5.734E-01 | 6.971E-01 |
| Weighted median | 1.062 (0.999, 1.129) | 5.382E-02 | 1.207E-01 |
| MR-RAPS | 1.037 (0.995, 1.081) | 8.212E-02 | 9.656E-01 |
| Maximum likelihood | 1.037 (0.995, 1.081) | 8.301E-02 | 1.719E-01 |
| Total Esterified Cholesterol | Cholesteryl esters | 53 | IVW | 1.018 (0.960, 1.080) | 5.432E-01 | 7.581E-01 |
| MR Egger | 1.022 (0.911, 1.147) | 7.097E-01 | 7.622E-01 |
| Weighted median | 1.049 (0.980, 1.123) | 1.698E-01 | 2.052E-01 |
| MR-RAPS | 1.019 (0.978, 1.061) | 3.720E-01 | 9.656E-01 |
| Maximum likelihood | 1.019 (0.978, 1.061) | 3.737E-01 | 5.432E-01 |
| Cholesteryl Esters in LDL | Cholesteryl esters | 38 | IVW | 1.041 (0.979, 1.106) | 1.979E-01 | 4.489E-01 |
| MR Egger | 1.033 (0.926, 1.152) | 5.650E-01 | 6.971E-01 |
| Weighted median | 1.066 (0.994, 1.143) | 7.232E-02 | 1.207E-01 |
| MR-RAPS | 1.042 (0.998, 1.087) | 6.265E-02 | 9.656E-01 |
| Maximum likelihood | 1.042 (0.998, 1.087) | 6.418E-02 | 1.564E-01 |
| Total Free Cholesterol | Free cholesterol | 47 | IVW | 1.043 (0.989, 1.099) | 1.196E-01 | 4.489E-01 |
| MR Egger | 1.039 (0.941, 1.146) | 4.518E-01 | 6.971E-01 |
| Weighted median | 1.059 (0.995, 1.126) | 7.280E-02 | 1.207E-01 |
| MR-RAPS | 1.045 (1.003, 1.088) | 3.444E-02 | 9.656E-01 |
| Maximum likelihood | 1.043 (1.002, 1.087) | 4.120E-02 | 1.378E-01 |
| Free Cholesterol in LDL | Free cholesterol | 44 | IVW | 1.021 (0.967, 1.078) | 4.585E-01 | 7.123E-01 |
| MR Egger | 1.033 (0.940, 1.135) | 5.020E-01 | 6.971E-01 |
| Weighted median | 1.059 (0.997, 1.125) | 6.419E-02 | 1.207E-01 |
| MR-RAPS | 1.021 (0.981, 1.063) | 3.064E-01 | 9.656E-01 |
| Maximum likelihood | 1.021 (0.981, 1.063) | 3.053E-01 | 4.660E-01 |
| Total Lipids in LDL | Total lipids | 39 | IVW | 1.041 (0.981, 1.105) | 1.837E-01 | 4.489E-01 |
| MR Egger | 1.032 (0.930, 1.145) | 5.595E-01 | 6.971E-01 |
| Weighted median | 1.063 (0.999, 1.132) | 5.430E-02 | 1.207E-01 |
| MR-RAPS | 1.042 (0.999, 1.087) | 5.457E-02 | 9.656E-01 |
| Maximum likelihood | 1.042 (0.999, 1.087) | 5.513E-02 | 1.564E-01 |
| Concentration of LDL Particles | Lipoprotein particle concentrations | 47 | IVW | 1.042 (0.987, 1.100) | 1.377E-01 | 4.489E-01 |
| MR Egger | 1.044 (0.950, 1.147) | 3.762E-01 | 6.971E-01 |
| Weighted median | 1.061 (0.995, 1.132) | 7.281E-02 | 1.207E-01 |
| MR-RAPS | 1.044 (1.004, 1.086) | 3.292E-02 | 9.656E-01 |
| Maximum likelihood | 1.043 (1.002, 1.085) | 4.020E-02 | 1.378E-01 |
| Apolipoprotein B | Apolipoproteins | 45 | IVW | 1.042 (0.985, 1.101) | 1.489E-01 | 4.489E-01 |
| MR Egger | 1.050 (0.953, 1.157) | 3.317E-01 | 6.971E-01 |
| Weighted median | 1.061 (0.996, 1.130) | 6.668E-02 | 1.207E-01 |
| MR-RAPS | 1.044 (1.003, 1.086) | 3.368E-02 | 9.656E-01 |
| Maximum likelihood | 1.042 (1.002, 1.085) | 4.122E-02 | 1.378E-01 |
| Glycine | Amino acids | 33 | IVW | 0.950 (0.921, 0.980) | 1.232E-03 | 1.191E-02 |
| MR Egger | 0.961 (0.927, 0.996) | 3.884E-02 | 6.971E-01 |
| Weighted median | 0.956 (0.934, 0.979) | 2.134E-04 | 3.095E-03 |
| MR-RAPS | 0.950 (0.930, 0.971) | 4.190E-06 | 9.069E-01 |
| Maximum likelihood | 0.950 (0.929, 0.971) | 4.463E-06 | 2.876E-05 |
| Cholesterol in Medium VLDL | Lipoprotein subclasses | 39 | IVW (fixed effects) | 1.034 (0.992, 1.078) | 1.120E-01 | 4.489E-01 |
| MR Egger | 1.052 (0.966, 1.146) | 2.481E-01 | 6.971E-01 |
| Weighted median | 1.059 (0.992, 1.131) | 8.616E-02 | 1.220E-01 |
| MR-RAPS | 1.036 (0.994, 1.080) | 9.232E-02 | 9.656E-01 |
| Maximum likelihood | 1.035 (0.992, 1.078) | 1.092E-01 | 2.111E-01 |
| Cholesteryl Esters in Medium VLDL | Lipoprotein subclasses | 39 | IVW | 1.032 (0.977, 1.089) | 2.664E-01 | 4.489E-01 |
| MR Egger | 1.079 (0.984, 1.183) | 1.158E-01 | 6.971E-01 |
| Weighted median | 1.057 (0.991, 1.127) | 8.984E-02 | 1.220E-01 |
| MR-RAPS | 1.034 (0.992, 1.077) | 1.155E-01 | 9.069E-01 |
| Maximum likelihood | 1.032 (0.990, 1.076) | 1.364E-01 | 2.398E-01 |
| Concentration of IDL Particles | Lipoprotein subclasses | 37 | IVW | 1.039 (0.985, 1.096) | 1.610E-01 | 4.489E-01 |
| MR Egger | 1.067 (0.974, 1.169) | 1.735E-01 | 6.971E-01 |
| Weighted median | 1.055 (0.988, 1.126) | 1.101E-01 | 1.389E-01 |
| MR-RAPS | 1.041 (1.000, 1.084) | 5.277E-02 | 9.656E-01 |
| Maximum likelihood | 1.040 (0.998, 1.083) | 6.146E-02 | 1.564E-01 |
| Total Lipids in IDL | Lipoprotein subclasses | 50 | IVW | 1.007 (0.955, 1.061) | 8.074E-01 | 8.421E-01 |
| MR Egger | 1.053 (0.962, 1.152) | 2.674E-01 | 6.971E-01 |
| Weighted median | 1.037 (0.977, 1.102) | 2.312E-01 | 2.682E-01 |
| MR-RAPS | 1.008 (0.971, 1.047) | 6.776E-01 | 9.069E-01 |
| Maximum likelihood | 1.007 (0.969, 1.045) | 7.318E-01 | 7.672E-01 |
| Phospholipids in IDL | Lipoprotein subclasses | 49 | IVW | 1.016 (0.969, 1.065) | 5.152E-01 | 7.470E-01 |
| MR Egger | 1.059 (0.981, 1.144) | 1.478E-01 | 6.971E-01 |
| Weighted median | 1.031 (0.977, 1.089) | 2.612E-01 | 2.970E-01 |
| MR-RAPS | 1.017 (0.981, 1.055) | 3.532E-01 | 9.069E-01 |
| Maximum likelihood | 1.016 (0.980, 1.054) | 3.929E-01 | 5.559E-01 |
| Cholesterol in IDL | Lipoprotein subclasses | 51 | IVW | 1.014 (0.961, 1.071) | 6.122E-01 | 7.877E-01 |
| MR Egger | 1.050 (0.953, 1.157) | 3.289E-01 | 6.971E-01 |
| Weighted median | 1.058 (0.995, 1.126) | 7.369E-02 | 1.207E-01 |
| MR-RAPS | 1.015 (0.976, 1.055) | 4.515E-01 | 9.656E-01 |
| Maximum likelihood | 1.014 (0.975, 1.055) | 4.747E-01 | 6.119E-01 |
| Cholesteryl Esters in IDL | Lipoprotein subclasses | 49 | IVW | 1.011 (0.956, 1.068) | 7.077E-01 | 8.049E-01 |
| MR Egger | 1.057 (0.957, 1.168) | 2.766E-01 | 6.971E-01 |
| Weighted median | 1.059 (0.994, 1.128) | 7.493E-02 | 1.207E-01 |
| MR-RAPS | 1.012 (0.972, 1.053) | 5.699E-01 | 9.194E-01 |
| Maximum likelihood | 1.011 (0.971, 1.052) | 6.024E-01 | 6.850E-01 |
| Free Cholesterol in IDL | Lipoprotein subclasses | 48 | IVW | 1.011 (0.957, 1.067) | 7.011E-01 | 8.049E-01 |
| MR Egger | 1.046 (0.952, 1.150) | 3.522E-01 | 6.971E-01 |
| Weighted median | 1.056 (0.992, 1.124) | 9.046E-02 | 1.220E-01 |
| MR-RAPS | 1.010 (0.972, 1.050) | 6.103E-01 | 9.656E-01 |
| Maximum likelihood | 1.011 (0.972, 1.051) | 5.925E-01 | 6.850E-01 |
| Concentration of Large LDL Particles | Lipoprotein subclasses | 49 | IVW | 1.043 (0.990, 1.099) | 1.114E-01 | 4.489E-01 |
| MR Egger | 1.030 (0.944, 1.124) | 5.099E-01 | 6.971E-01 |
| Weighted median | 1.059 (0.994, 1.127) | 7.455E-02 | 1.207E-01 |
| MR-RAPS | 1.044 (1.004, 1.085) | 2.965E-02 | 9.656E-01 |
| Maximum likelihood | 1.044 (1.004, 1.086) | 2.963E-02 | 1.378E-01 |
| Total Lipids in Large LDL | Lipoprotein subclasses | 40 | IVW | 1.032 (0.976, 1.091) | 2.709E-01 | 4.489E-01 |
| MR Egger | 1.046 (0.948, 1.154) | 3.737E-01 | 6.971E-01 |
| Weighted median | 1.062 (0.995, 1.134) | 7.252E-02 | 1.207E-01 |
| MR-RAPS | 1.034 (0.992, 1.078) | 1.124E-01 | 9.656E-01 |
| Maximum likelihood | 1.033 (0.991, 1.076) | 1.287E-01 | 2.333E-01 |
| Phospholipids in Large LDL | Lipoprotein subclasses | 40 | IVW | 1.041 (0.981, 1.105) | 1.862E-01 | 4.489E-01 |
| MR Egger | 1.032 (0.933, 1.142) | 5.425E-01 | 6.971E-01 |
| Weighted median | 1.062 (0.997, 1.131) | 6.327E-02 | 1.207E-01 |
| MR-RAPS | 1.042 (0.999, 1.086) | 5.682E-02 | 9.656E-01 |
| Maximum likelihood | 1.042 (0.999, 1.087) | 5.679E-02 | 1.564E-01 |
| Cholesterol in Large LDL | Lipoprotein subclasses | 41 | IVW | 1.036 (0.980, 1.094) | 2.146E-01 | 4.489E-01 |
| MR Egger | 1.048 (0.952, 1.154) | 3.463E-01 | 6.971E-01 |
| Weighted median | 1.062 (0.996, 1.132) | 6.467E-02 | 1.207E-01 |
| MR-RAPS | 1.038 (0.995, 1.082) | 8.068E-02 | 9.656E-01 |
| Maximum likelihood | 1.036 (0.994, 1.080) | 9.273E-02 | 1.855E-01 |
| Cholesteryl Esters in Large LDL | Lipoprotein subclasses | 41 | IVW | 1.041 (0.981, 1.104) | 1.813E-01 | 4.489E-01 |
| MR Egger | 1.028 (0.926, 1.141) | 6.105E-01 | 6.971E-01 |
| Weighted median | 1.064 (0.998, 1.135) | 5.741E-02 | 1.207E-01 |
| MR-RAPS | 1.042 (0.999, 1.086) | 5.522E-02 | 9.656E-01 |
| Maximum likelihood | 1.042 (0.999, 1.087) | 5.545E-02 | 1.564E-01 |
| Free Cholesterol in Large LDL | Lipoprotein subclasses | 45 | IVW | 1.013 (0.962, 1.066) | 6.248E-01 | 7.877E-01 |
| MR Egger | 1.046 (0.957, 1.143) | 3.265E-01 | 6.971E-01 |
| Weighted median | 1.059 (0.989, 1.133) | 9.976E-02 | 1.315E-01 |
| MR-RAPS | 1.013 (0.973, 1.054) | 5.228E-01 | 9.656E-01 |
| Maximum likelihood | 1.013 (0.973, 1.054) | 5.259E-01 | 6.489E-01 |
| Total Lipids in Medium LDL | Lipoprotein subclasses | 40 | IVW | 1.048 (0.982, 1.119) | 1.552E-01 | 4.489E-01 |
| MR Egger | 1.051 (0.932, 1.184) | 4.231E-01 | 6.971E-01 |
| Weighted median | 1.074 (1.003, 1.150) | 4.119E-02 | 1.207E-01 |
| MR-RAPS | 1.049 (1.005, 1.096) | 3.057E-02 | 9.656E-01 |
| Maximum likelihood | 1.049 (1.004, 1.096) | 3.285E-02 | 1.378E-01 |
| Phospholipids in Medium LDL | Lipoprotein subclasses | 39 | IVW | 1.019 (0.962, 1.080) | 5.133E-01 | 7.470E-01 |
| MR Egger | 1.067 (0.967, 1.177) | 2.057E-01 | 6.971E-01 |
| Weighted median | 1.067 (1.000, 1.139) | 5.105E-02 | 1.207E-01 |
| MR-RAPS | 1.020 (0.977, 1.064) | 3.740E-01 | 9.194E-01 |
| Maximum likelihood | 1.020 (0.977, 1.064) | 3.746E-01 | 5.432E-01 |
| Cholesterol in Medium LDL | Lipoprotein subclasses | 40 | IVW | 1.046 (0.980, 1.117) | 1.757E-01 | 4.489E-01 |
| MR Egger | 1.052 (0.933, 1.186) | 4.139E-01 | 6.971E-01 |
| Weighted median | 1.073 (0.999, 1.151) | 5.231E-02 | 1.207E-01 |
| MR-RAPS | 1.047 (1.002, 1.094) | 4.031E-02 | 9.656E-01 |
| Maximum likelihood | 1.047 (1.001, 1.094) | 4.276E-02 | 1.378E-01 |
| Free Cholesterol in Medium LDL | Lipoprotein subclasses | 41 | IVW | 1.012 (0.955, 1.072) | 6.844E-01 | 8.049E-01 |
| MR Egger | 1.073 (0.976, 1.180) | 1.505E-01 | 6.971E-01 |
| Weighted median | 1.063 (0.997, 1.133) | 6.336E-02 | 1.207E-01 |
| MR-RAPS | 1.012 (0.971, 1.055) | 5.656E-01 | 9.069E-01 |
| Maximum likelihood | 1.012 (0.971, 1.055) | 5.686E-01 | 6.731E-01 |
| Concentration of Small LDL Particles | Lipoprotein subclasses | 46 | IVW | 1.084 (1.025, 1.147) | 4.854E-03 | 3.128E-02 |
| MR Egger | 1.050 (0.951, 1.159) | 3.412E-01 | 6.971E-01 |
| Weighted median | 1.069 (1.002, 1.139) | 4.234E-02 | 1.207E-01 |
| MR-RAPS | 1.086 (1.040, 1.133) | 1.512E-04 | 9.656E-01 |
| Maximum likelihood | 1.084 (1.039, 1.132) | 1.921E-04 | 1.114E-03 |
| Total Lipids in Small LDL | Lipoprotein subclasses | 40 | IVW | 1.037 (0.979, 1.099) | 2.126E-01 | 4.489E-01 |
| MR Egger | 1.022 (0.926, 1.128) | 6.645E-01 | 7.411E-01 |
| Weighted median | 1.065 (0.999, 1.135) | 5.509E-02 | 1.207E-01 |
| MR-RAPS | 1.038 (0.996, 1.082) | 7.877E-02 | 9.656E-01 |
| Maximum likelihood | 1.038 (0.996, 1.082) | 7.939E-02 | 1.705E-01 |
| Phospholipids in Small LDL | Lipoprotein subclasses | 44 | IVW | 1.015 (0.960, 1.074) | 5.993E-01 | 7.877E-01 |
| MR Egger | 1.024 (0.936, 1.120) | 6.130E-01 | 6.971E-01 |
| Weighted median | 1.058 (0.998, 1.122) | 5.893E-02 | 1.207E-01 |
| MR-RAPS | 1.015 (0.978, 1.055) | 4.294E-01 | 9.656E-01 |
| Maximum likelihood | 1.015 (0.978, 1.055) | 4.302E-01 | 5.941E-01 |
| Cholesterol in Small LDL | Lipoprotein subclasses | 41 | IVW | 1.040 (0.978, 1.106) | 2.097E-01 | 4.489E-01 |
| MR Egger | 1.029 (0.926, 1.143) | 5.977E-01 | 6.971E-01 |
| Weighted median | 1.065 (0.997, 1.137) | 6.281E-02 | 1.207E-01 |
| MR-RAPS | 1.041 (0.998, 1.086) | 6.403E-02 | 9.656E-01 |
| Maximum likelihood | 1.041 (0.998, 1.086) | 6.472E-02 | 1.564E-01 |
| Cholesteryl Esters in Small LDL | Lipoprotein subclasses | 43 | IVW | 1.047 (0.981, 1.117) | 1.670E-01 | 4.489E-01 |
| MR Egger | 1.020 (0.907, 1.147) | 7.409E-01 | 7.674E-01 |
| Weighted median | 1.067 (0.994, 1.146) | 7.217E-02 | 1.207E-01 |
| MR-RAPS | 1.047 (1.004, 1.093) | 3.163E-02 | 9.656E-01 |
| Maximum likelihood | 1.047 (1.004, 1.093) | 3.379E-02 | 1.378E-01 |
| Free Cholesterol in Small LDL | Lipoprotein subclasses | 44 | IVW | 1.007 (0.956, 1.060) | 7.932E-01 | 8.421E-01 |
| MR Egger | 1.048 (0.964, 1.139) | 2.757E-01 | 6.971E-01 |
| Weighted median | 1.058 (0.995, 1.126) | 7.232E-02 | 1.207E-01 |
| MR-RAPS | 1.007 (0.969, 1.047) | 7.251E-01 | 9.069E-01 |
| Maximum likelihood | 1.007 (0.969, 1.047) | 7.250E-01 | 7.672E-01 |
| Phospholipids to total lipids ratio in medium VLDL | Ratios | 39 | IVW | 1.020 (0.967, 1.076) | 4.667E-01 | 7.123E-01 |
| MR Egger | 1.053 (0.961, 1.153) | 2.757E-01 | 6.971E-01 |
| Weighted median | 1.060 (0.997, 1.127) | 6.449E-02 | 1.207E-01 |
| MR-RAPS | 1.019 (0.981, 1.059) | 3.259E-01 | 9.656E-01 |
| Maximum likelihood | 1.021 (0.982, 1.061) | 3.048E-01 | 4.660E-01 |
| Cholesterol to total lipids ratio in medium VLDL | Ratios | 58 | IVW | 0.880 (0.824, 0.941) | 1.760E-04 | 3.403E-03 |
| MR Egger | 0.953 (0.854, 1.064) | 3.982E-01 | 6.971E-01 |
| Weighted median | 0.901 (0.838, 0.968) | 4.649E-03 | 4.494E-02 |
| MR-RAPS | 0.884 (0.852, 0.918) | 6.160E-11 | 9.069E-01 |
| Maximum likelihood | 0.881 (0.847, 0.916) | 2.306E-10 | 4.458E-09 |
| Free cholesterol to total lipids ratio in medium VLDL | Ratios | 42 | IVW | 0.993 (0.939, 1.050) | 8.011E-01 | 8.421E-01 |
| MR Egger | 1.053 (0.955, 1.161) | 3.040E-01 | 6.971E-01 |
| Weighted median | 1.042 (0.974, 1.116) | 2.293E-01 | 2.682E-01 |
| MR-RAPS | 0.988 (0.950, 1.027) | 5.355E-01 | 9.069E-01 |
| Maximum likelihood | 0.993 (0.953, 1.034) | 7.316E-01 | 7.672E-01 |
| Triglycerides to total lipids ratio in medium VLDL | Ratios | 51 | IVW | 1.108 (1.035, 1.186) | 3.064E-03 | 2.310E-02 |
| MR Egger | 1.025 (0.912, 1.152) | 6.804E-01 | 7.446E-01 |
| Weighted median | 1.096 (1.014, 1.186) | 2.156E-02 | 1.207E-01 |
| MR-RAPS | 1.107 (1.065, 1.149) | 1.670E-07 | 9.069E-01 |
| Maximum likelihood | 1.111 (1.067, 1.156) | 3.425E-07 | 3.311E-06 |
| Phospholipids to total lipids ratio in small VLDL | Ratios | 45 | IVW | 0.971 (0.922, 1.022) | 2.575E-01 | 4.489E-01 |
| MR Egger | 1.009 (0.923, 1.103) | 8.441E-01 | 8.441E-01 |
| Weighted median | 0.972 (0.908, 1.041) | 4.198E-01 | 4.509E-01 |
| MR-RAPS | 0.967 (0.930, 1.005) | 8.972E-02 | 9.194E-01 |
| Maximum likelihood | 0.970 (0.931, 1.011) | 1.557E-01 | 2.511E-01 |
| Cholesterol to total lipids ratio in small VLDL | Ratios | 42 | IVW | 1.008 (0.952, 1.067) | 7.781E-01 | 8.421E-01 |
| MR Egger | 1.085 (0.993, 1.186) | 7.934E-02 | 6.971E-01 |
| Weighted median | 1.061 (0.991, 1.136) | 8.915E-02 | 1.220E-01 |
| MR-RAPS | 1.007 (0.968, 1.048) | 7.269E-01 | 9.069E-01 |
| Maximum likelihood | 1.008 (0.968, 1.050) | 6.871E-01 | 7.664E-01 |
| Free cholesterol to total lipids ratio in small VLDL | Ratios | 50 | IVW | 0.912 (0.859, 0.970) | 3.186E-03 | 2.310E-02 |
| MR Egger | 0.962 (0.864, 1.070) | 4.765E-01 | 6.971E-01 |
| Weighted median | 0.914 (0.851, 0.982) | 1.413E-02 | 1.171E-01 |
| MR-RAPS | 0.914 (0.881, 0.947) | 8.920E-07 | 9.069E-01 |
| Maximum likelihood | 0.913 (0.878, 0.949) | 3.632E-06 | 2.633E-05 |
| Triglycerides to total lipids ratio in small VLDL | Ratios | 46 | IVW | 1.007 (0.950, 1.067) | 8.185E-01 | 8.421E-01 |
| MR Egger | 0.934 (0.851, 1.025) | 1.565E-01 | 6.971E-01 |
| Weighted median | 0.943 (0.882, 1.009) | 8.809E-02 | 1.220E-01 |
| MR-RAPS | 1.008 (0.968, 1.049) | 7.093E-01 | 9.069E-01 |
| Maximum likelihood | 1.007 (0.966, 1.049) | 7.407E-01 | 7.672E-01 |
| Cholesterol to total lipids ratio in very small VLDL | Ratios | 50 | IVW | 0.910 (0.860, 0.961) | 8.204E-04 | 9.516E-03 |
| MR Egger | 0.917 (0.834, 1.009) | 8.052E-02 | 6.971E-01 |
| Weighted median | 0.892 (0.835, 0.952) | 6.039E-04 | 7.006E-03 |
| MR-RAPS | 0.912 (0.883, 0.943) | 4.060E-08 | 9.656E-01 |
| Maximum likelihood | 0.909 (0.878, 0.942) | 9.383E-08 | 1.088E-06 |
| Cholesteryl esters to total lipids ratio in very small VLDL | Ratios | 52 | IVW | 0.881 (0.832, 0.932) | 1.137E-05 | 3.299E-04 |
| MR Egger | 0.894 (0.812, 0.985) | 2.728E-02 | 6.971E-01 |
| Weighted median | 0.886 (0.831, 0.944) | 1.911E-04 | 3.095E-03 |
| MR-RAPS | 0.887 (0.857, 0.918) | 7.360E-12 | 9.656E-01 |
| Maximum likelihood | 0.881 (0.849, 0.914) | 1.101E-11 | 3.192E-10 |
| Free cholesterol to total lipids ratio in very small VLDL | Ratios | 32 | IVW | 0.986 (0.920, 1.056) | 6.777E-01 | 8.049E-01 |
| MR Egger | 1.045 (0.927, 1.178) | 4.755E-01 | 6.971E-01 |
| Weighted median | 0.987 (0.922, 1.057) | 7.093E-01 | 7.218E-01 |
| MR-RAPS | 0.985 (0.943, 1.029) | 4.986E-01 | 9.069E-01 |
| Maximum likelihood | 0.985 (0.942, 1.030) | 5.156E-01 | 6.489E-01 |
| Triglycerides to total lipids ratio in very small VLDL | Ratios | 52 | IVW | 1.114 (1.050, 1.182) | 3.581E-04 | 5.193E-03 |
| MR Egger | 1.077 (0.969, 1.197) | 1.752E-01 | 6.971E-01 |
| Weighted median | 1.140 (1.070, 1.214) | 4.899E-05 | 1.421E-03 |
| MR-RAPS | 1.111 (1.073, 1.150) | 4.070E-09 | 9.656E-01 |
| Maximum likelihood | 1.117 (1.076, 1.159) | 5.047E-09 | 7.319E-08 |
| Cholesterol to total lipids ratio in IDL | Ratios | 45 | IVW | 0.986 (0.941, 1.033) | 5.620E-01 | 7.581E-01 |
| MR Egger | 0.931 (0.865, 1.003) | 6.708E-02 | 6.971E-01 |
| Weighted median | 0.960 (0.909, 1.013) | 1.357E-01 | 1.675E-01 |
| MR-RAPS | 0.981 (0.948, 1.016) | 2.876E-01 | 9.069E-01 |
| Maximum likelihood | 0.986 (0.951, 1.023) | 4.627E-01 | 6.099E-01 |
| Cholesteryl esters to total lipids ratio in IDL | Ratios | 36 | IVW | 0.984 (0.934, 1.037) | 5.559E-01 | 7.581E-01 |
| MR Egger | 0.943 (0.866, 1.027) | 1.849E-01 | 6.971E-01 |
| Weighted median | 0.972 (0.920, 1.026) | 3.001E-01 | 3.347E-01 |
| MR-RAPS | 0.982 (0.945, 1.019) | 3.306E-01 | 9.069E-01 |
| Maximum likelihood | 0.984 (0.946, 1.025) | 4.421E-01 | 5.964E-01 |
| Triglycerides to total lipids ratio in IDL | Ratios | 57 | IVW | 1.084 (1.024, 1.148) | 5.637E-03 | 3.270E-02 |
| MR Egger | 1.068 (0.971, 1.175) | 1.784E-01 | 6.971E-01 |
| Weighted median | 1.048 (0.993, 1.106) | 8.855E-02 | 1.220E-01 |
| MR-RAPS | 1.083 (1.051, 1.117) | 2.270E-07 | 9.656E-01 |
| Maximum likelihood | 1.085 (1.051, 1.120) | 5.632E-07 | 4.666E-06 |
| Cholesterol to total lipids ratio in large LDL | Ratios | 44 | IVW | 0.969 (0.911, 1.030) | 3.064E-01 | 4.937E-01 |
| MR Egger | 0.965 (0.843, 1.104) | 6.066E-01 | 6.971E-01 |
| Weighted median | 0.976 (0.905, 1.052) | 5.247E-01 | 5.533E-01 |
| MR-RAPS | 0.965 (0.925, 1.006) | 9.030E-02 | 9.656E-01 |
| Maximum likelihood | 0.968 (0.927, 1.011) | 1.448E-01 | 2.470E-01 |
| Free cholesterol to total lipids ratio in large LDL | Ratios | 59 | IVW | 0.854 (0.806, 0.905) | 9.236E-08 | 5.357E-06 |
| MR Egger | 0.889 (0.815, 0.971) | 1.157E-02 | 6.710E-01 |
| Weighted median | 0.851 (0.801, 0.904) | 1.712E-07 | 9.931E-06 |
| MR-RAPS | 0.870 (0.841, 0.899) | 1.130E-16 | 9.069E-01 |
| Maximum likelihood | 0.854 (0.823, 0.886) | 2.664E-17 | 1.545E-15 |
| Triglycerides to total lipids ratio in large LDL | Ratios | 43 | IVW | 1.005 (0.946, 1.069) | 8.643E-01 | 8.643E-01 |
| MR Egger | 1.049 (0.928, 1.186) | 4.493E-01 | 6.971E-01 |
| Weighted median | 1.009 (0.939, 1.084) | 8.094E-01 | 8.094E-01 |
| MR-RAPS | 1.012 (0.970, 1.056) | 5.853E-01 | 9.656E-01 |
| Maximum likelihood | 1.005 (0.961, 1.052) | 8.127E-01 | 8.127E-01 |
| Triglycerides to total lipids ratio in medium LDL | Ratios | 45 | IVW | 1.005 (0.961, 1.051) | 8.276E-01 | 8.421E-01 |
| MR Egger | 1.013 (0.944, 1.086) | 7.312E-01 | 7.674E-01 |
| Weighted median | 1.013 (0.965, 1.064) | 5.975E-01 | 6.188E-01 |
| MR-RAPS | 1.003 (0.970, 1.036) | 8.647E-01 | 9.656E-01 |
| Maximum likelihood | 1.005 (0.972, 1.039) | 7.659E-01 | 7.793E-01 |
| Phospholipids to total lipids ratio in large HDL | Ratios | 50 | IVW | 1.012 (0.957, 1.071) | 6.675E-01 | 8.049E-01 |
| MR Egger | 1.015 (0.916, 1.125) | 7.733E-01 | 7.869E-01 |
| Weighted median | 1.033 (0.964, 1.107) | 3.524E-01 | 3.856E-01 |
| MR-RAPS | 1.018 (0.979, 1.058) | 3.659E-01 | 9.656E-01 |
| Maximum likelihood | 1.013 (0.973, 1.054) | 5.412E-01 | 6.539E-01 |

Abbreviations: SNPs, single nucleotide polymorphisms; OR, odds ratio; CI, confidence interval; IVW, inverse-variance weighted; MR, Mendelian randomization; RAPS, Robust Adjusted Profile Score; HDL, high-density lipoprotein; VLDL, very-low-density lipoprotein; IDL, intermediate-density lipoprotein; LDL, low-density lipoprotein.

**Table S5.** Baseline characteristics of participants in the second stage

| **Characteristics** | | | **Incident CH** | | ***P* value** |
| --- | --- | --- | --- | --- | --- |
| **No (n=179)** | **Yes (n=27)** |
| Age, mean (SD), years | | | 46.91 (6.90) | 48.96 (8.10) | 0.161 |
| Race, No. (%) | | |  |  | 0.127 |
|  | White | | 170 (95.0) | 23 (85.2) |  |
|  | Others | | 9 (5.0) | 4 (14.8) |  |
| Education level, No. (%) | | |  |  | 0.485 |
|  | | College or university degree | 67 (37.4) | 12 (44.4) |  |
|  | Others | | 112 (62.6) | 15 (55.6) |  |
| Smoking status, No. (%) | | |  |  | 0.571 |
|  | Never | | 116 (64.8) | 19 (70.4) |  |
|  | Former/current | | 63 (35.2) | 8 (29.6) |  |
| Drinking status, No. (%) | | |  |  | 1.000 |
|  | Never | | 8 (4.5) | 1 (3.7) |  |
|  | Former/current | | 171 (95.5) | 26 (96.3) |  |
| TDI, mean (SD) | | | -1.94 (2.75) | -1.26 (3.57) | 0.251 |
| Physical activity, median (IQR), min/week | | | 1725.00 (690.00, 3263.50) | 1134.00 (469.00, 2382.00) | 0.201 |
| BMI, No. (%) | | |  |  | 0.656 |
|  | Underweight or normal | | 83 (46.4) | 10 (37.0) |  |
|  | Overweight | | 58 (32.4) | 10 (37.0) |  |
|  | Obese | | 38 (21.2) | 7 (25.9) |  |
| Parity, No. (%) | | |  |  | 0.112 |
|  | 1 birth | | 53 (29.6) | 4 (14.8) |  |
|  | 2 births | | 83 (46.4) | 12 (44.4) |  |
|  | >2 births | | 43 (24.0) | 11 (40.7) |  |
| Family history of hypertension, No. (%) | | |  |  | 0.660 |
|  | No | | 81 (45.3) | 11 (40.7) |  |
|  | Yes | | 98 (54.7) | 16 (59.3) |  |
| **Blood-based measurements** | | |  |  |  |
| SBP, mean (SD), mmHg | | | 128.53 (14.55) | 144.57 (18.14) | **<0.001** |
| DBP, mean (SD), mmHg | | | 80.92 (9.46) | 90.43 (9.30) | **<0.001** |
| Blood glucose, mean (SD), mmol/L | | | 4.94 (0.78) | 4.93 (0.77) | 0.943 |
| Total cholesterol, mean (SD), mmol/L | | | 5.45 (0.98) | 5.90 (1.20) | **0.029** |
| LDL cholesterol, mean (SD), mmol/L | | | 3.40 (0.74) | 3.72 (0.91) | **0.047** |
| HDL cholesterol, mean (SD), mmol/L | | | 1.51 (0.32) | 1.65 (0.42) | **0.039** |
| Triglycerides, mean (SD), mmol/L | | | 1.36 (0.71) | 1.75 (1.93) | 0.051 |

Abbreviations: CH, chronic hypertension; SD, standard deviation; IQR, interquartile range; TDI, the Townsend deprivation index; BMI, body mass index; SBP, systolic blood pressure; DBP, diastolic blood pressure; LDL, low-density lipoprotein; HDL, high-density lipoprotein.
